# Supplementary material
Source: PubMed Central journal article supplement (PMC7300308)
Supplement: mmc1.pdf [file mmc1.pdf]

**Biophysical Journal, Volume 118**

**Supplemental Information**

**Microtubule Simulations Provide Insight into the Molecular Mechanism  
Underlying Dynamic Instability**

**Dudu Tong and Gregory A. Voth**

Supporting Figure S1:

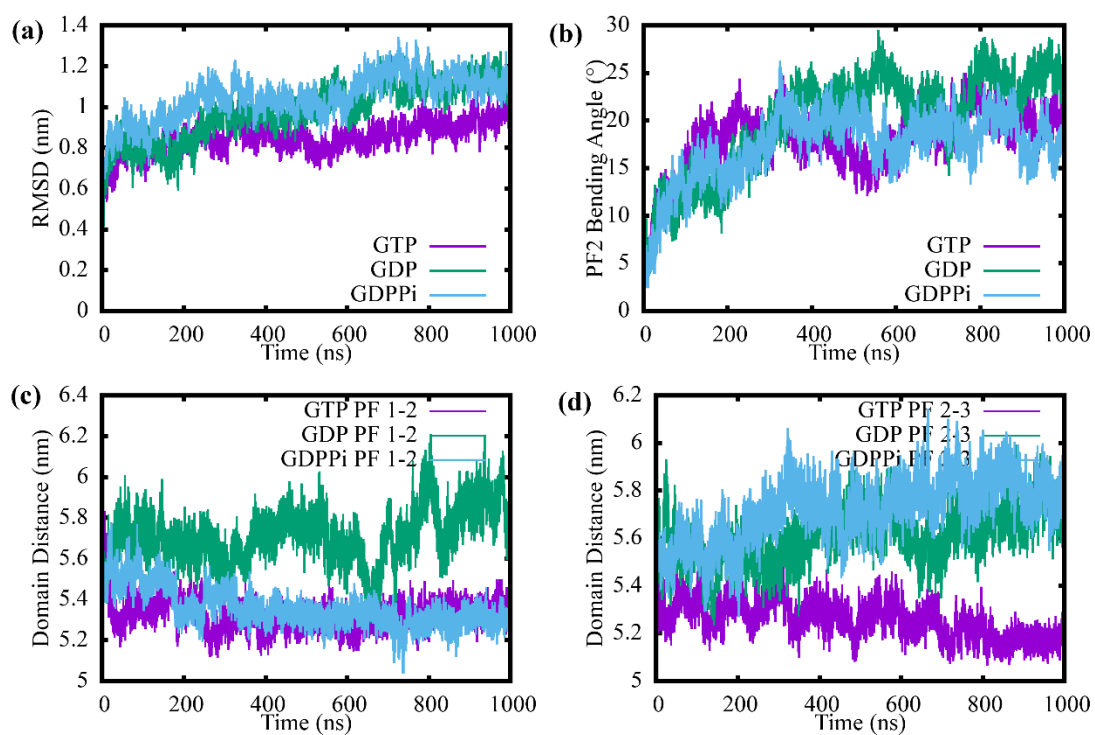

**Figure S1:** Convergence analysis of 1  $\mu$ s 3-PF MT patch simulations in different nucleotide states. Shown are the time evolution of (a)  $C\alpha$  RMSD value, (b) The bending angle of the middle PF in the MT patch, (c) The COM distance between  $\beta$  tubulin domains at the top of PF 1 and 2, (d) The COM distance between  $\beta$  tubulin domains at the top of PF 2 and 3.

Supporting Figure S2:

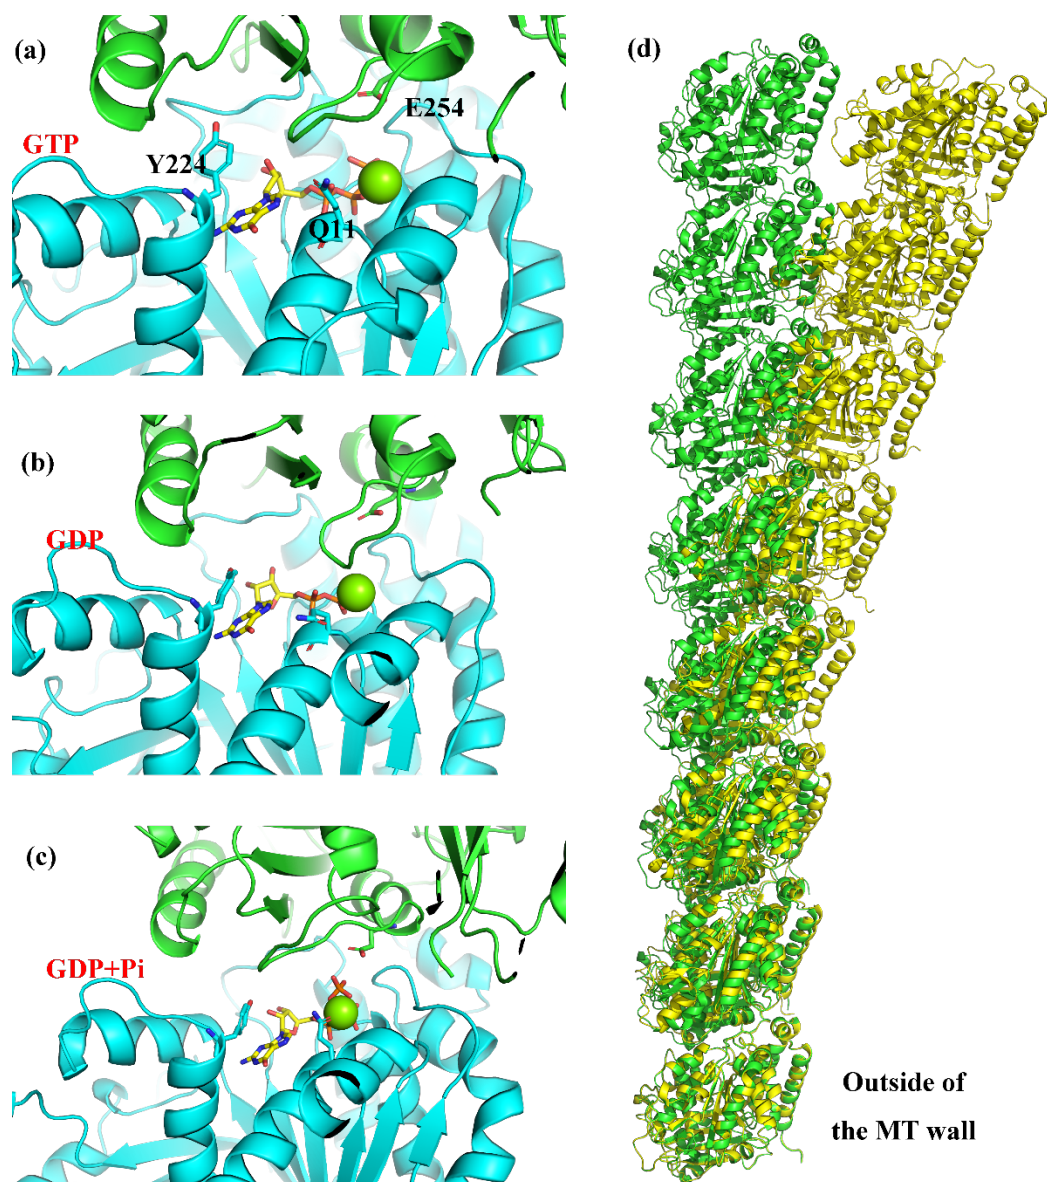

**Figure S2:** Snapshot view of the last frame simulation structure. (a-c) The exchangeable nucleotide binding site in the top of the middle PF, with the binding of (a) GTP, (b) GDP, (c) GDP+Pi. The  $\beta$  tubulin is colored in cyan and  $\alpha$  tubulin domain is colored in green. The bound nucleotide and residue E254 ( $\alpha$ ), Q11 ( $\beta$ ) and Y224 ( $\beta$ ) is represented by sticks. (d) The outward bending of middle PF in GTP state simulation. The cryo-EM structure with straight PF is colored in green, while the structure in simulation is colored in yellow.

Supporting Figure S3:

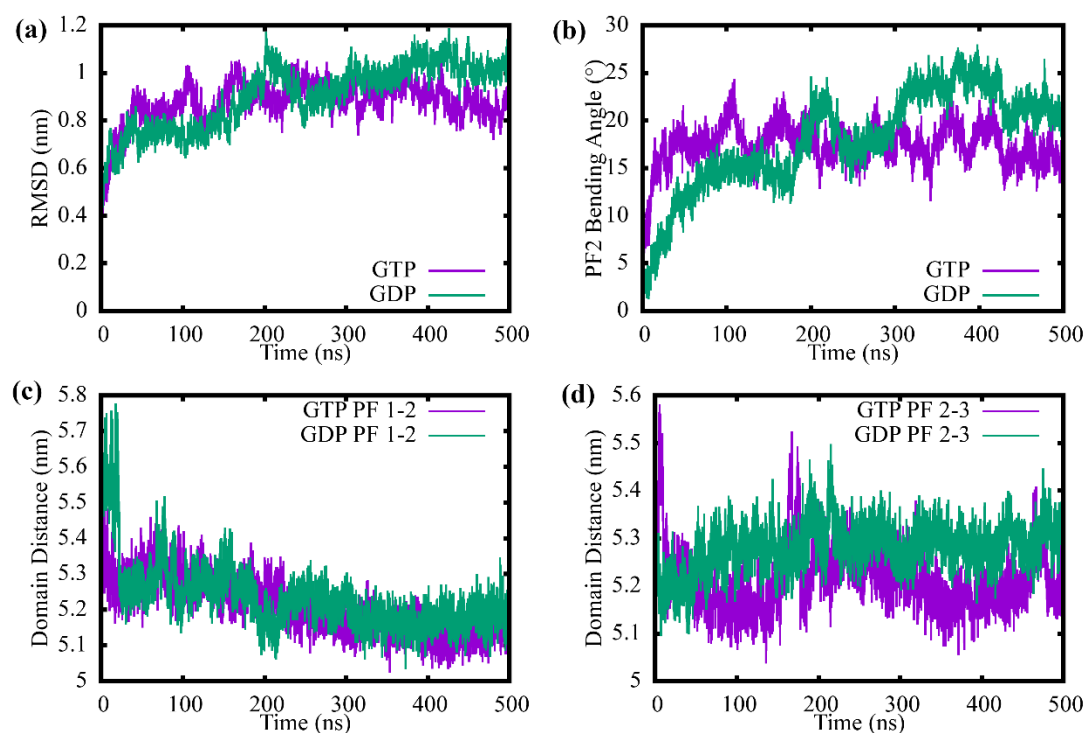

**Figure S3:** Convergence analysis of 500 ns 3-PF MT patch simulations in different nucleotide states starting from alternative structures with PDB IDs: 3JAT (GTP) and 3JAS (GDP). Shown are the time evolution of (a) C $\alpha$  RMSD value, (b) The bending angle of the middle PF in the MT patch, (c) The COM distance between  $\beta$  tubulin domains at the top of PF 1 and 2, (d) The COM distance between  $\beta$  tubulin domains at the top of PF 2 and 3.

Supporting Figure S4:

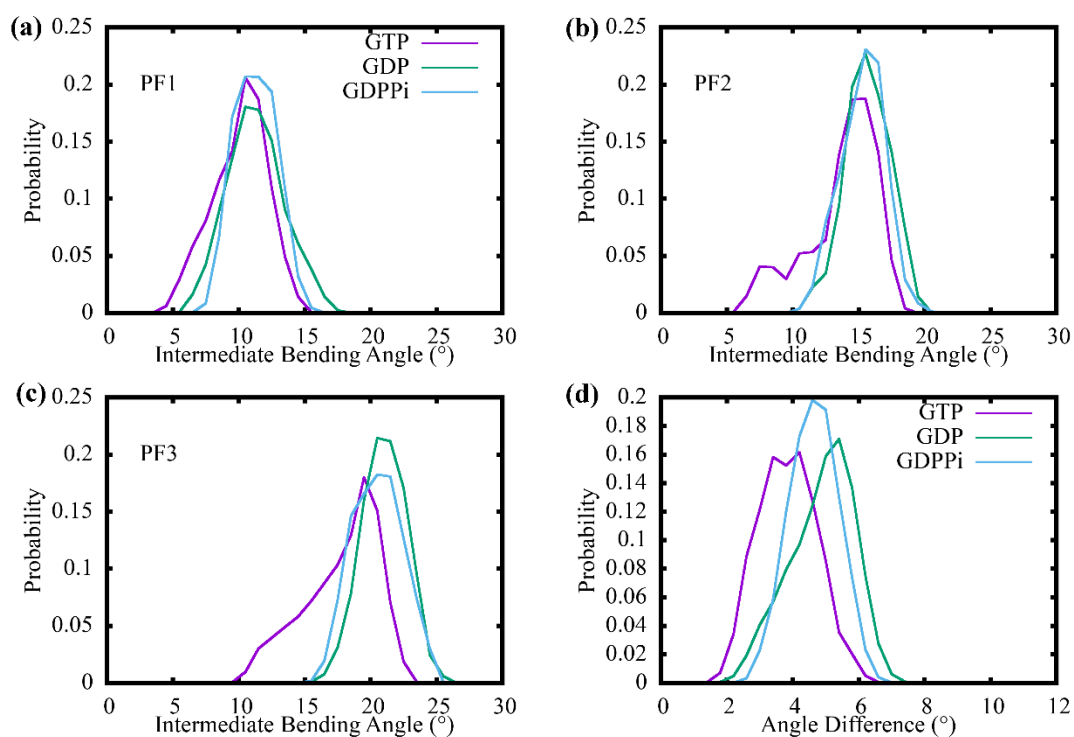

**Figure S4:** The bending angle distributions of intermediate tubulin dimers. Shown here are the results from third tubulin dimer numbering from the PF bottom. (a-c) Comparison of bending angle distributions of the MT PFs in the GTP (purple), GDP (green), and GDP+Pi (cyan) states. (d) The probability distributions of bending angle differences between neighboring PFs in three different nucleotide states.

Supporting Figure S5:

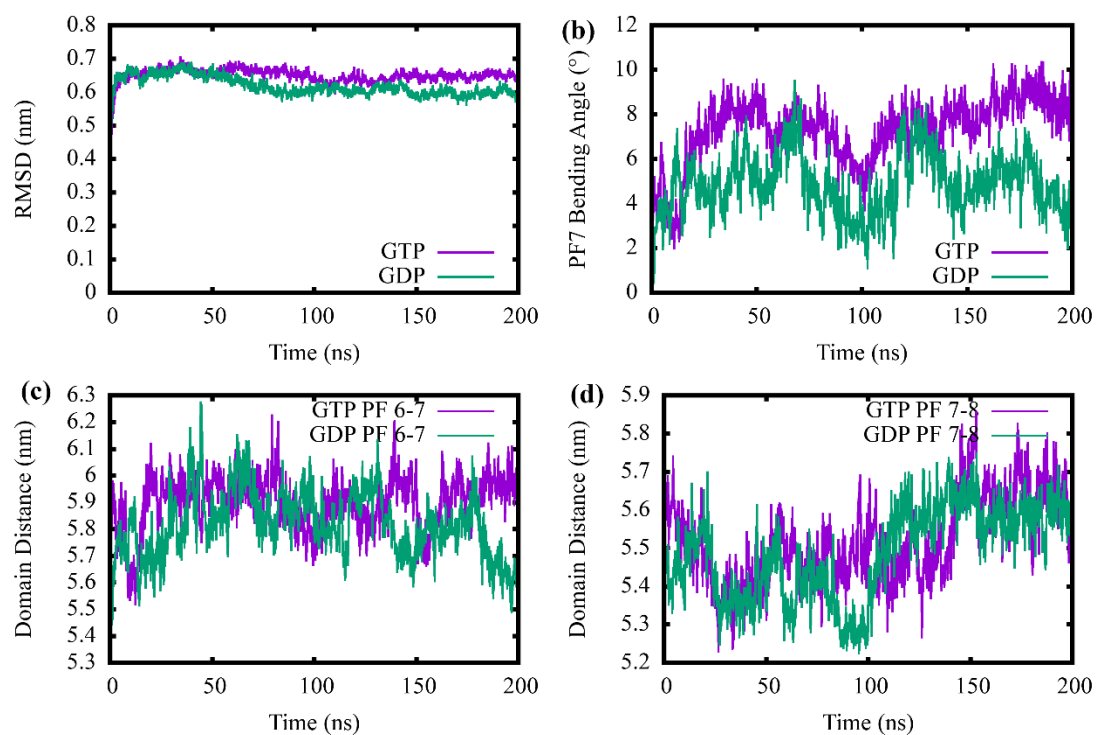

**Figure S5:** Convergence analysis of 200 ns closed MT segment simulations in different nucleotide states. Shown are the time evolution of (a) C $\alpha$  RMSD value, (b) The bending angle of the middle PF in the closed MT segment, (c) The COM distance between  $\beta$  tubulin domains at the top of the middle PF 6 and 7, (d) The COM distance between  $\beta$  tubulin domains at the top of the middle PF 7 and 8.
